# Supplementary material for: Targeted In Vivo Extracellular Matrix Formation Promotes Neovascularization in a Rodent Model of Myocardial Infarction
Source: PLOS journal article supplement (doi:10.1371/journal.pone.0010384), 2010-04-28

**Figure S1.** Cell morphology. To assess cell morphology, untreated 35 mm CoStar dishes were coated with with 100  $\mu\text{g/mL}$  of **(a)** Col IV, **(b)** Hep I, **(c)** Hep III, **(d)** FN, **(e)** FC/HV, or **(f)** RGD. The whole ECM protein was used as the positive control, and PBS-treated wells were treated as a negative control. Each dish was seeded with  $\sim 20,000$  HUVECs. Shown here are after 1 day of incubation at  $37^\circ\text{C}$ , 5.0%  $\text{CO}_2$ . The cells were observed with an inverted light microscope (Nikon Eclipse TE300).

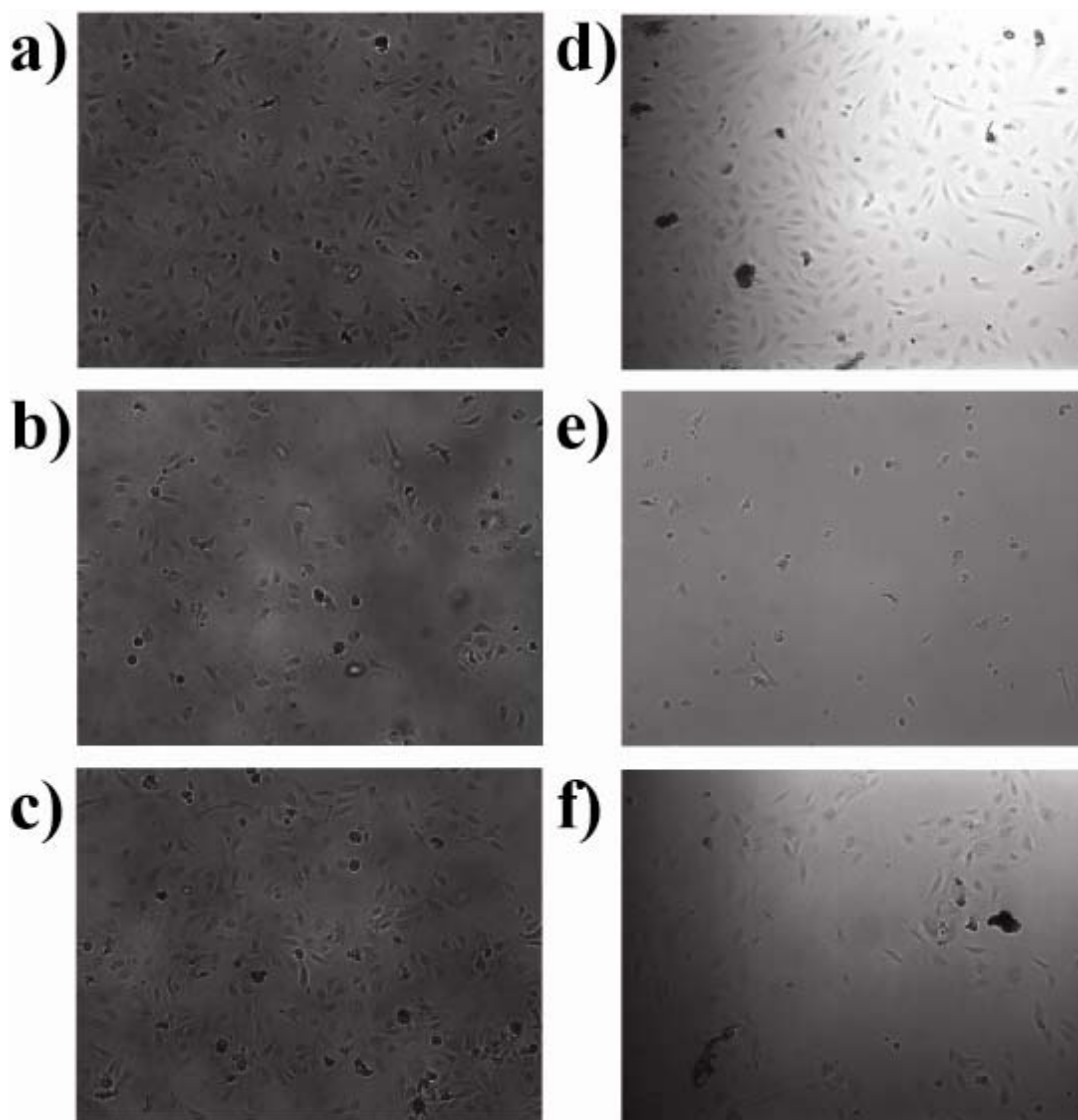

Supplement: S1 (10.1371/journal.pone.0010384.s001) [file journal.pone.0010384.s001]
